# Supplementary material for: Bioaerosols as indicators of central Arctic ice nucleating particle sources
Source: Copernicus journal article supplement (doi:10.5194/egusphere-2025-128), 2025-02-07
Supplement: Supplementary file 1 [file egusphere-2025-128-supplement.pdf]

# Supplement for: Bioaerosols as indicators of central Arctic ice nucleating particle sources

Kevin R. Barry<sup>1,\*</sup>, Thomas C. J. Hill<sup>1</sup>, Sonia M. Kreidenweis<sup>1</sup>, Paul J. DeMott<sup>1</sup>, Yutaka Tobo<sup>2,3</sup> and Jessie M. Creamean<sup>1</sup>

<sup>1</sup>Department of Atmospheric Science, Colorado State University, 1371 Campus Delivery, Fort Collins, Colorado 80523-1371, United States of America

<sup>2</sup>National Institute of Polar Research, Tachikawa, Tokyo 190-8518, Japan

10 <sup>3</sup>Graduate Institute for Advanced Studies, SOKENDAI, Tachikawa, Tokyo 190-8518, Japan

\*Correspondence to: Kevin R. Barry (Kevin.Barry@colostate.edu)

## Text S1

INP concentrations reported herein for filter-based collections and processing are typically higher than previously published MOSAiC INP concentrations based on DRUM size-segregated samples (Fig. S6: (Creamean et al., 2022)). For the DRUM data that represent an integration of all size stages (0.15-12  $\mu\text{m}$ ), seasonally-averaged concentrations for INPs active at -15  $^{\circ}\text{C}$  were as follows: fall= $1.8 \times 10^{-5} \text{ L}^{-1}$ ; winter= $6.1 \times 10^{-5} \text{ L}^{-1}$ ; spring= $6.3 \times 10^{-5} \text{ L}^{-1}$ ; summer= $1.1 \times 10^{-3} \text{ L}^{-1}$ . Seasonal averages for the polycarbonate filters were  $4.4 \times 10^{-3} \text{ L}^{-1}$ ,  $1.1 \times 10^{-3} \text{ L}^{-1}$ ,  $1.1 \times 10^{-3} \text{ L}^{-1}$ , and  $1.9 \times 10^{-1} \text{ L}^{-1}$ . Similar seasonality trends were detected in both data sets, although with 1-3 orders of magnitude lower concentrations for the integrated DRUM samples for INP activation temperatures warmer than -20  $^{\circ}\text{C}$  (Fig. S6). There are several potential explanations for the discrepancies observed, such as differences in sampling inlets (Creamean et al., 2022), aerosol collection size range, sample integration time differences (24- versus 72-hour), inefficient collection (e.g. potential particle bounce in cold environments) and removal of particles during analysis, and certain samples (and stages) subjected to a different cooling rate than others during analysis of DRUM samples (Between 0-8  $^{\circ}\text{C min}^{-1}$ ). Comparison tests and investigations of this unexpected result are ongoing. Overall, the INPs from the DRUM and cold plate analysis should be viewed as a lower bound or subset of observed total aerosol INPs.

25

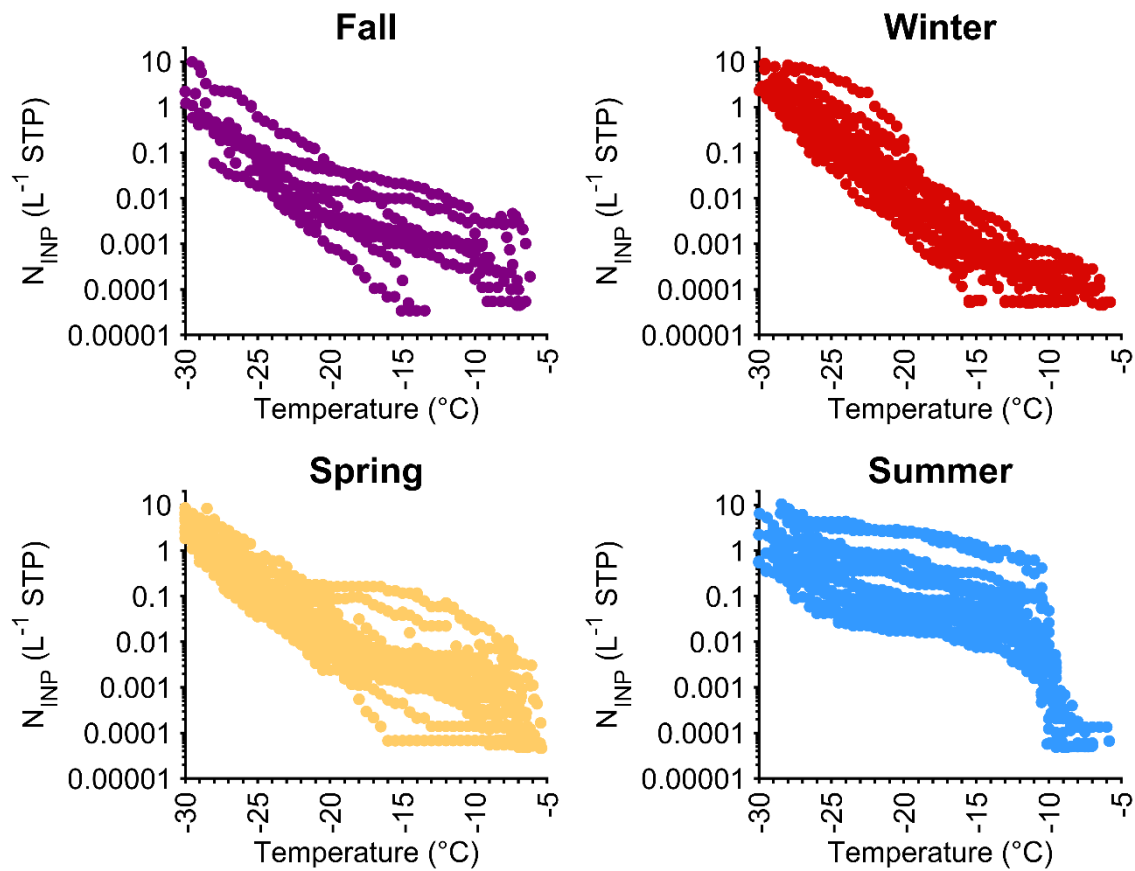

**Figure S1:** Cumulative INP-temperature spectra, colored by season. Fall (Purple: September, October, November), Winter (Red: December, January, February), Spring (Yellow: March, April, May), Summer (Blue: June, July, August).

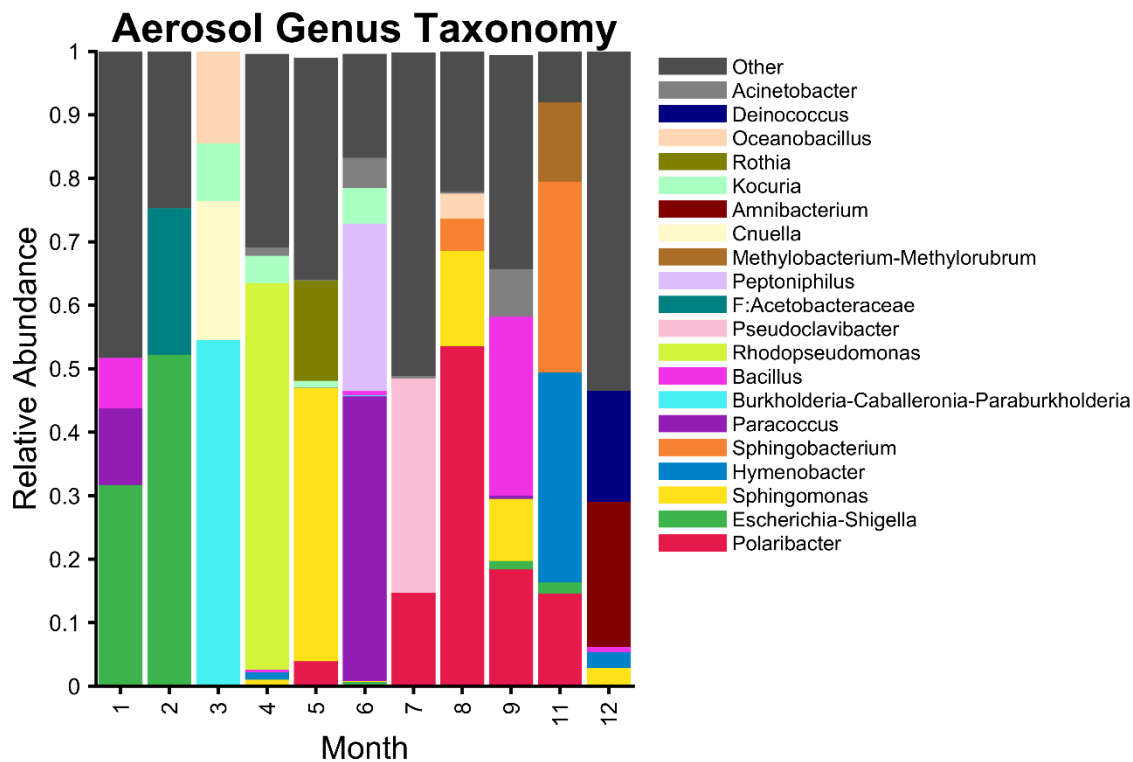

**Figure S2:** Pooled monthly aerosol bacterial taxonomy plot, colored by the top 20 genera. Any taxa contributing less than 0.1% relative abundance were excluded from the analysis.

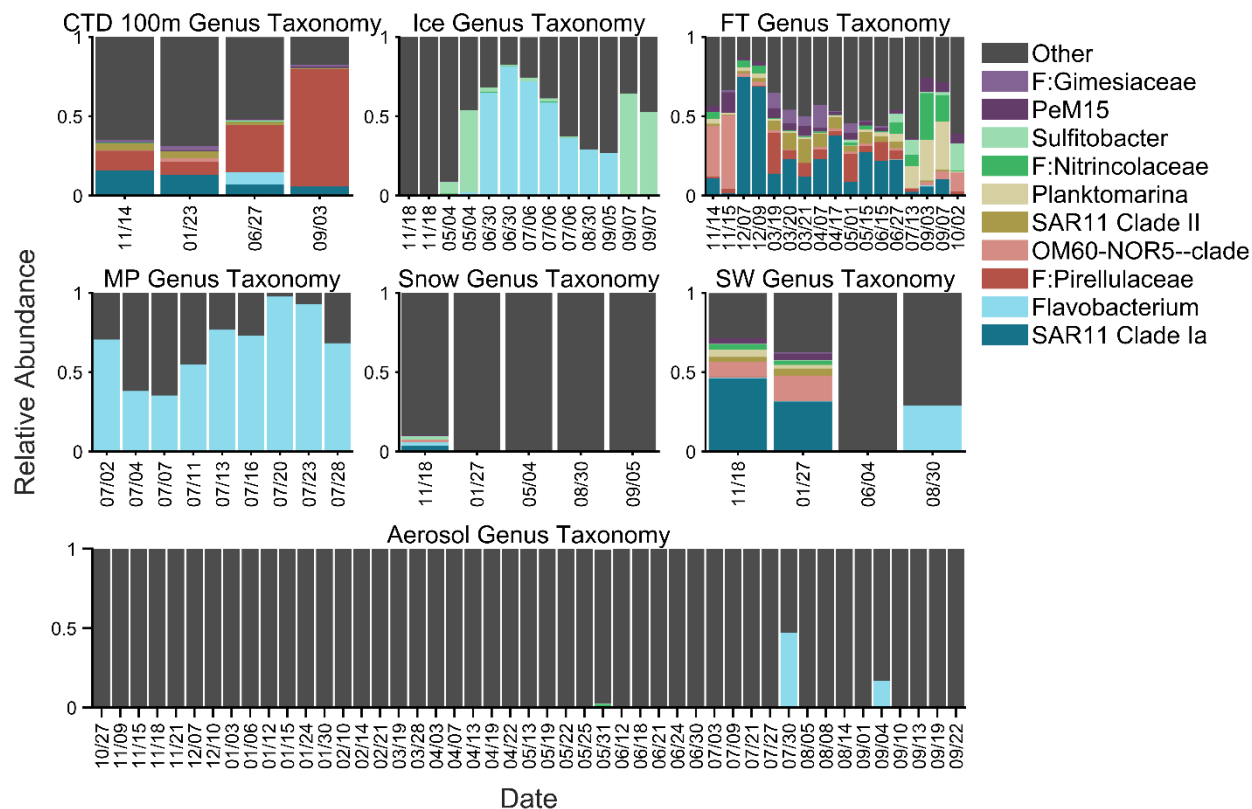

**Figure S3:** Bacterial genus level relative abundance taxonomy for the different potential local sources and aerosol as a function of month collected. FT=Flowthrough; MP=Melt pond; SW=Lead water. The samples are colored by the top 10 genera for all source samples combined, with family (F) given if not resolved at the genus level.

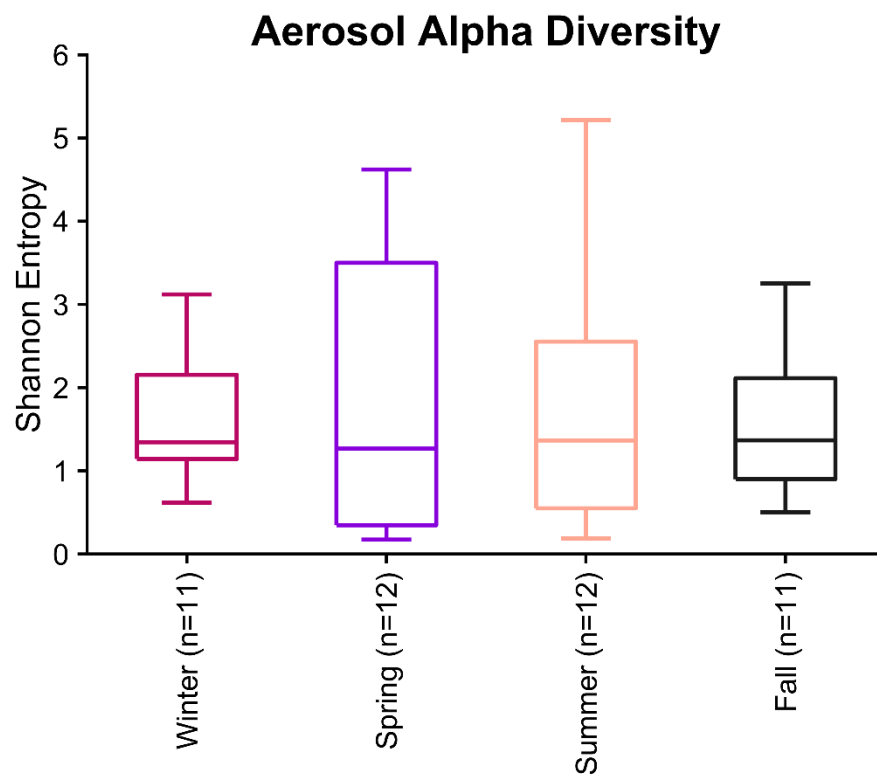

**Figure S4:** Alpha diversity (Shannon entropy) as a function of season for the bacterial aerosol samples. Number of samples (n=) is given.

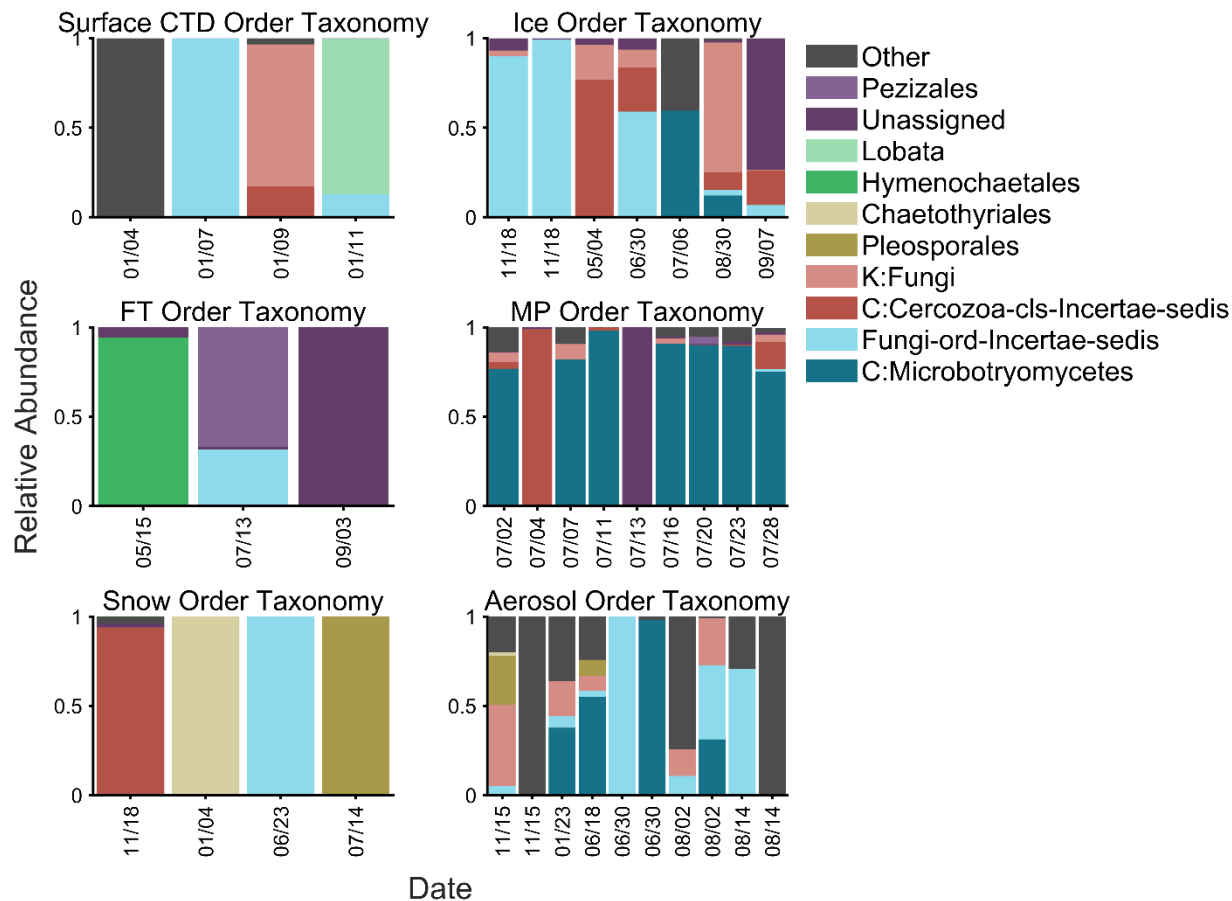

**Figure S5:** Fungal order level relative abundance taxonomy for the different potential local sources and aerosol as a function of month collected. FT=Flowthrough; MP=Melt pond; SW=Lead water. The samples are colored by the top 10 genera for all sources combined, with kingdom (K), phylum (P), and class (C) given if not resolved at the genus level.

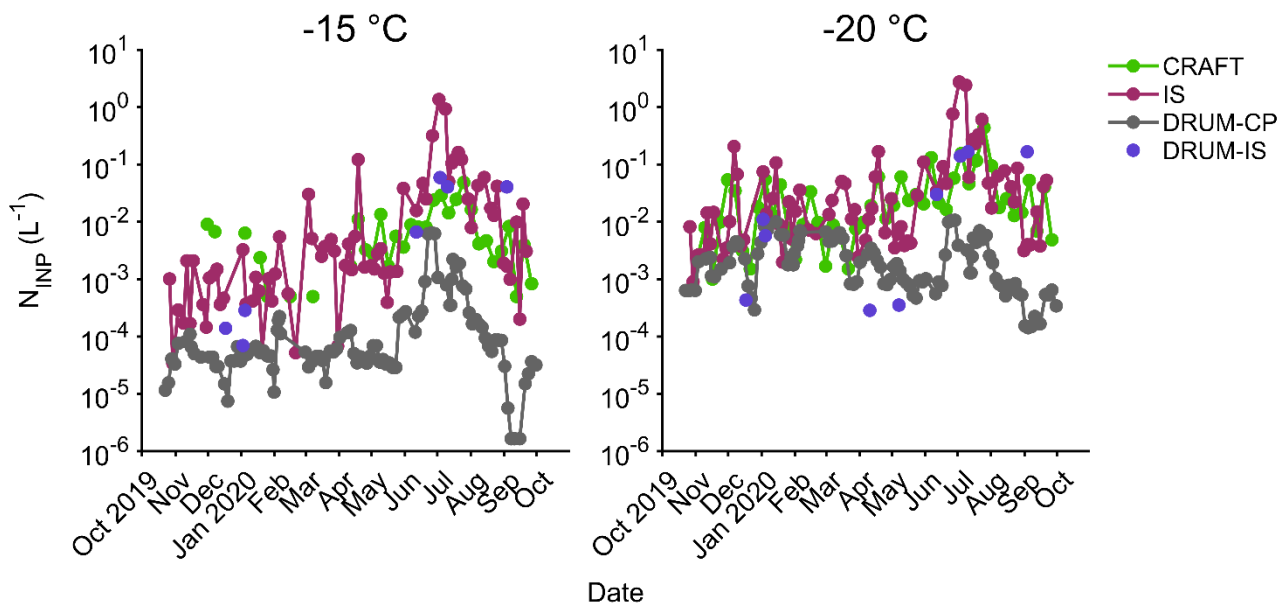

**Figure S6:** INP concentration time series during the MOSAiC campaign at -15 °C (left) and -20 °C (right). CRAFT (green) refers to data take at Zeppelin Observatory at Svalbard (Pereira Freitas et al., 2023; Tobo et al., 2024); IS (purple) refers to filter samples analyzed with the Ice Spectrometer; DRUM-CP (gray) refers to the total DRUM samples analyzed on the cold plate; and DRUM-IS (blue) refers to select total DRUM samples analyzed on the Ice Spectrometer. Size resolved aerosol for INP analyses were collected with a 4-stage Davis Rotating-drum Unit for Monitoring cascade impactor (DRUM) with the AOS inlet (Creamean et al., 2022).

| Type | Collection Date (UTC) | Latitude (°N) | Longitude (°E) | Depth (m)      |
|------|-----------------------|---------------|----------------|----------------|
| Snow | 10/25/2019 12:00      | 85.436900     | 128.146900     | 0.26           |
| FT   | 11/14/2019 6:30       | 86.188309     | 118.416527     | 11             |
| CTD  | 11/14/2019 12:00      | 86.153053     | 118.109711     | 100            |
| CTD  | 11/14/2019 12:00      | 86.153053     | 118.109711     | 10             |
| CTD  | 11/14/2019 12:00      | 86.153053     | 118.109711     | 200            |
| CTD  | 11/14/2019 12:00      | 86.153053     | 118.109711     | 20             |
| CTD  | 11/14/2019 12:00      | 86.153053     | 118.109711     | 2              |
| FT   | 11/15/2019 12:00      | 86.174263     | 118.245308     | 11             |
| Ice  | 11/18/2019 12:00      | 85.849571     | 120.581451     | Bottom 0-5 cm  |
| Ice  | 11/18/2019 12:00      | 85.849571     | 120.581451     | Bottom 5-10 cm |
| Snow | 11/18/2019 12:00      | 85.849571     | 120.581451     | 0              |
| SW   | 11/18/2019 12:00      | 85.849571     | 120.581451     | 0              |
| CTD  | 12/6/2019 12:00       | 86.140556     | 122.196701     | 10             |
| FT   | 12/7/2019 10:00       | 86.161652     | 122.141006     | 11             |
| FT   | 12/9/2019 9:30        | 86.401390     | 120.931358     | 11             |
| CTD  | 1/23/2020 12:00       | 87.446587     | 94.088547      | 100            |

|      |                 |           |           |                |
|------|-----------------|-----------|-----------|----------------|
| CTD  | 1/23/2020 12:00 | 87.446587 | 94.088547 | 10             |
| CTD  | 1/23/2020 12:00 | 87.446587 | 94.088547 | 200            |
| CTD  | 1/23/2020 12:00 | 87.446587 | 94.088547 | 20             |
| CTD  | 1/23/2020 12:00 | 87.446587 | 94.088547 | 2              |
| CTD  | 1/23/2020 12:00 | 87.446587 | 94.088547 | 50             |
| CTD  | 1/23/2020 12:00 | 87.446587 | 94.088547 | 75             |
| Snow | 1/27/2020 12:00 | 87.445847 | 95.670288 | 0              |
| SW   | 1/27/2020 12:00 | 87.445847 | 95.670288 | 0              |
| FT   | 3/19/2020 19:38 | 86.466080 | 13.943270 | 11             |
| FT   | 3/20/2020 11:57 | 86.330116 | 14.791050 | 11             |
| FT   | 3/21/2020 18:42 | 86.246986 | 15.426960 | 11             |
| Snow | 3/22/2020 12:00 | 86.230000 | 15.751200 | 0.215-0.24     |
| FT   | 4/7/2020 14:58  | 84.496758 | 14.549860 | 11             |
| CTD  | 4/17/2020 12:00 | 84.409119 | 13.652770 | 2              |
| CTD  | 4/17/2020 12:00 | 84.409119 | 13.652770 | 20             |
| FT   | 4/17/2020 18:58 | 84.428001 | 13.761420 | 11             |
| FT   | 5/1/2020 17:30  | 83.922569 | 17.615120 | 11             |
| Ice  | 5/4/2020 12:00  | 83.886208 | 18.240580 | Top 0-10 cm    |
| Ice  | 5/4/2020 12:00  | 83.886009 | 18.314541 | Top 30-40 cm   |
| Snow | 5/4/2020 12:00  | 83.886208 | 18.240580 | 0              |
| SW   | 5/4/2020 12:00  | 83.886208 | 18.240580 | 0              |
| FT   | 5/15/2020 16:30 | 83.392342 | 9.178190  | 11             |
| FT   | 6/15/2020 19:10 | 82.218620 | 8.210060  | 11             |
| Snow | 6/23/2020 12:00 | 81.998700 | 9.696600  | 0.3-0.32       |
| CTD  | 6/27/2020 12:00 | 81.955391 | 9.903160  | 100            |
| CTD  | 6/27/2020 12:00 | 81.955391 | 9.903160  | 10             |
| CTD  | 6/27/2020 12:00 | 81.955391 | 9.903160  | 2              |
| CTD  | 6/27/2020 12:00 | 81.955391 | 9.903160  | 50             |
| CTD  | 6/27/2020 12:00 | 81.955391 | 9.903160  | NA             |
| CTD  | 6/27/2020 12:00 | 81.955391 | 9.903160  | 150            |
| FT   | 6/27/2020 16:30 | 81.918716 | 9.770960  | 11             |
| Ice  | 6/30/2020 12:00 | 81.783981 | 8.948390  | Bottom 0-5 cm  |
| Ice  | 6/30/2020 12:00 | 81.783981 | 8.948390  | Bottom 5-10 cm |
| MP   | 7/2/2020 12:00  | NA        | NA        | 0              |
| MP   | 7/4/2020 12:00  | NA        | NA        | 0              |
| Ice  | 7/6/2020 12:00  | 81.674088 | 5.190190  | NA             |
| Ice  | 7/6/2020 12:00  | 81.673447 | 5.171660  | Bottom 5-10 cm |
| Ice  | 7/6/2020 12:00  | 81.673447 | 5.171660  | Bottom 0-5 cm  |
| MP   | 7/7/2020 12:00  | NA        | NA        | 0              |



|          |                 |           |            |              |
|----------|-----------------|-----------|------------|--------------|
| MP       | 7/11/2020 12:00 | NA        | NA         | 0            |
| MP       | 7/13/2020 12:00 | NA        | NA         | 0            |
| FT       | 7/13/2020 21:02 | 81.406662 | 0.257950   | 11           |
| CTD      | 7/16/2020 12:00 | 81.230972 | 0.298100   | 2            |
| CTD      | 7/16/2020 12:00 | 81.230972 | 0.298100   | 11           |
| MP       | 7/16/2020 12:00 | NA        | NA         | 0            |
| MP       | 7/20/2020 12:00 | NA        | NA         | 0            |
| MP       | 7/23/2020 12:00 | NA        | NA         | 0            |
| MP       | 7/28/2020 12:00 | NA        | NA         | 0            |
| Lead Ice | 8/30/2020 12:00 | NA        | NA         | 0            |
| SW       | 8/30/2020 12:00 | NA        | NA         | 0            |
| Snow     | 8/30/2020 12:00 | NA        | NA         | 0            |
| CTD      | 9/3/2020 12:00  | 88.560738 | 119.607590 | 100          |
| CTD      | 9/3/2020 12:00  | 88.560738 | 119.607590 | 10           |
| CTD      | 9/3/2020 12:00  | 88.560738 | 119.607590 | 200          |
| CTD      | 9/3/2020 12:00  | 88.560738 | 119.607590 | 2            |
| CTD      | 9/3/2020 12:00  | 88.560738 | 119.607590 | 50           |
| CTD      | 9/3/2020 12:00  | 88.560738 | 119.607590 | 20           |
| FT       | 9/3/2020 12:23  | 88.602692 | 120.106117 | 11           |
| Lead Ice | 9/5/2020 12:00  | NA        | NA         | 0            |
| Snow     | 9/5/2020 12:00  | NA        | NA         | 0            |
| Ice      | 9/7/2020 12:00  | 88.722420 | 112.059280 | Top 0-10 cm  |
| Ice      | 9/7/2020 12:00  | 88.722420 | 112.059280 | Top 10-20 cm |
| FT       | 9/7/2020 13:30  | 88.688126 | 111.565254 | 11           |
| FT       | 10/2/2020 12:00 | NA        | NA         | 11           |

**Table S1:** List of potential source samples sequenced with Type (FT=Flowthrough seawater samples; CTD=seawater samples collected on a Conductivity, Temperature, and Depth rosette; SW=Surface or lead seawater samples; MP=Melt pond freshwater samples); Source tracking category; Collection date in UTC (12:00 given if no specific time recorded); Collection latitude in degrees, Collection longitude in degrees; and approximate collection depth in meters. Not available (NA) is indicated, and a default time of “12:00” is given if one was not recorded.
